# Supplementary material
Source: PubMed Central journal article supplement (PMC9743141)
Supplement: NIHMS1841035-supplement-1.pdf [file NIHMS1841035-supplement-1.pdf]

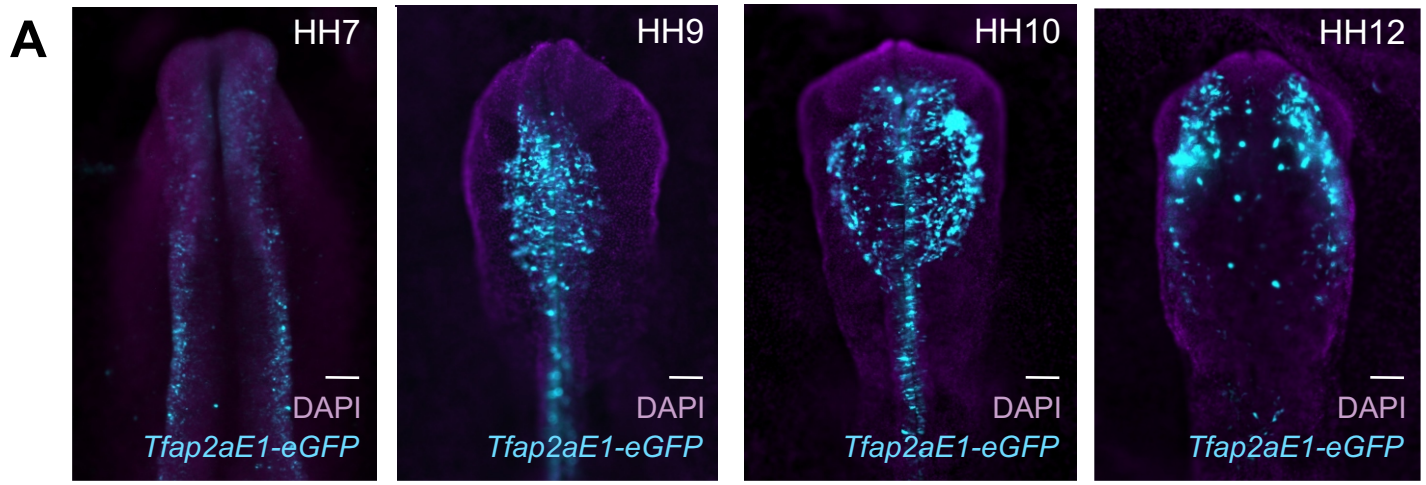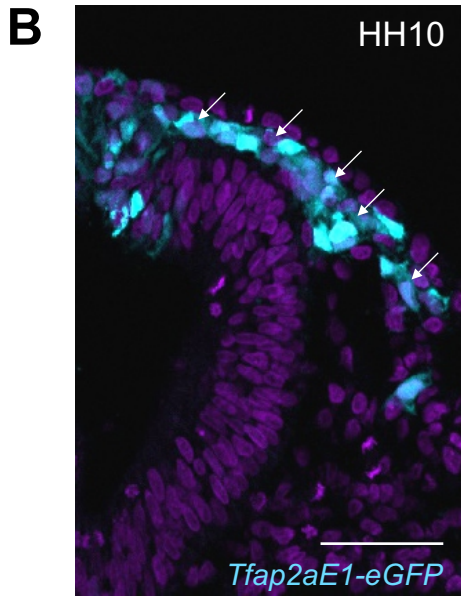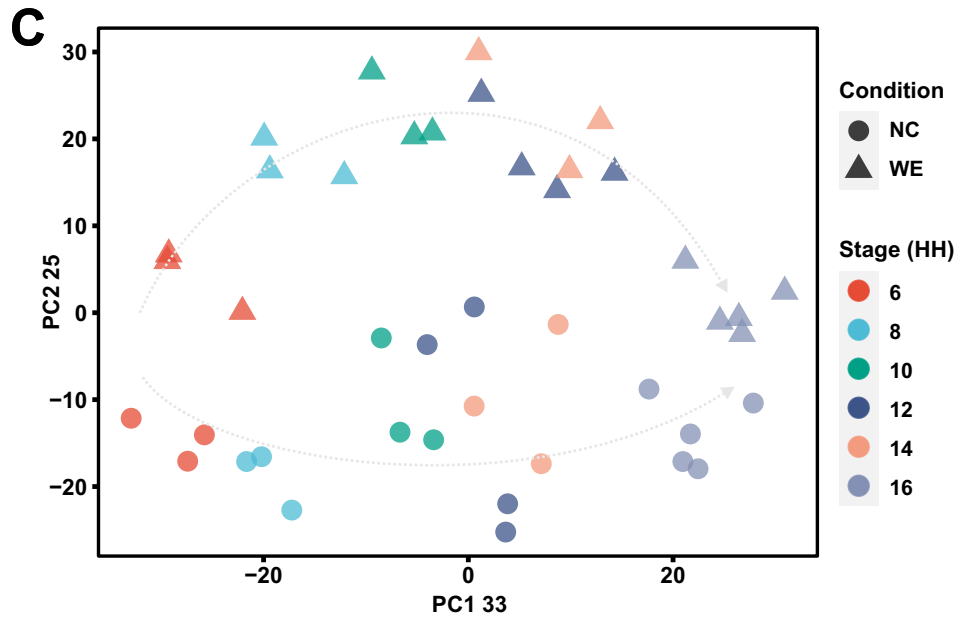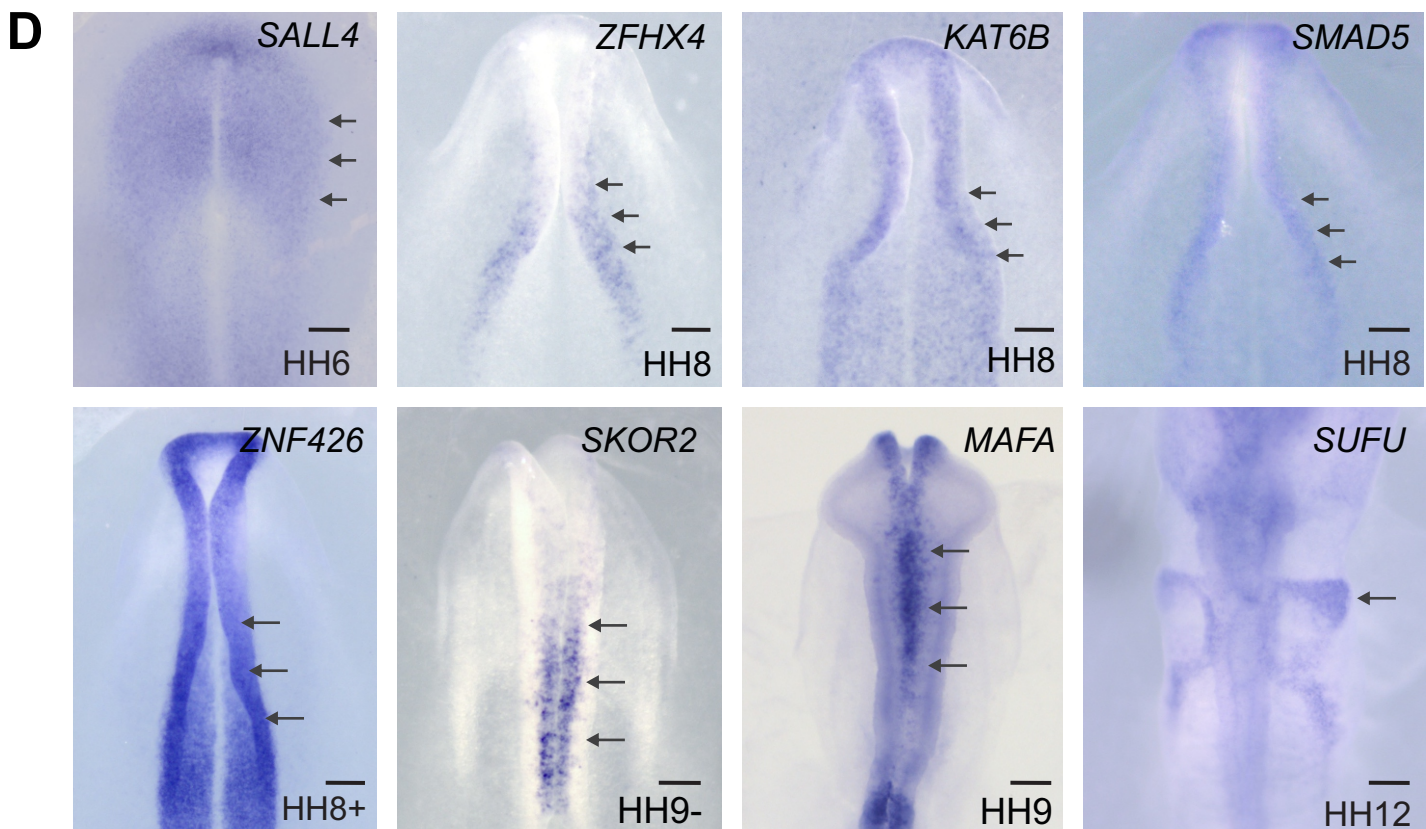

**Fig. S1. (Related to figure 1) Characterization of *TFAP2AE1* expression, RNA-Seq quality control and enriched factor in-situ hybridization**

**(A)** *Ex ovo* electroporation of *Tfap2aE1-GFP* shows enhancer activity in the dorsal neural folds (HH7), and in the early migrating (HH9-10) and late migrating (HH12) cranial neural crest. Scale bar 100  $\mu\text{m}$ .

**(B)** Cross-section of a HH10 chicken embryo, showing that activity of the *Tfap2aE1-GFP* enhancer is specific to the neural crest. Scale bar 50  $\mu\text{m}$ .

**(C)** Principal component analysis of both neural crest (GFP+) and whole embryo (GFP-) RNA-Seq samples. Principal component 1 (33% of variance) separates both conditions by developmental time, while principal component 2 (25% of variance) separates neural crest and whole embryo samples.

**(D)** Whole mount *in situ* hybridizations for significantly enriched factors expressed in the neural crest lineage. Scale bar 100  $\mu\text{m}$ .

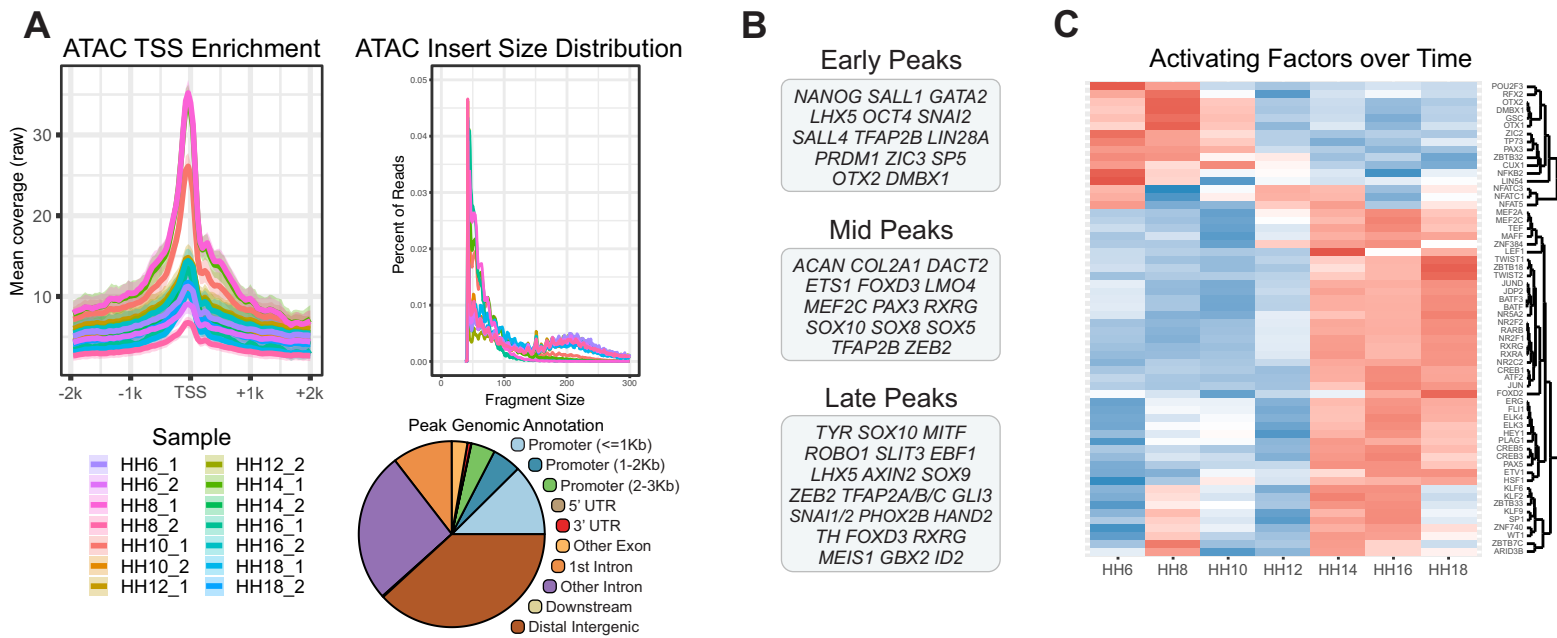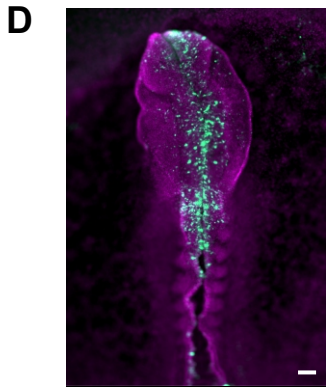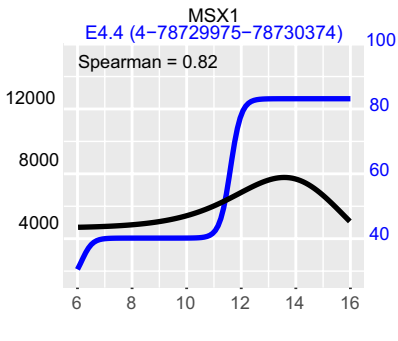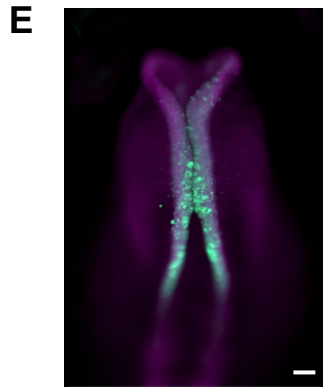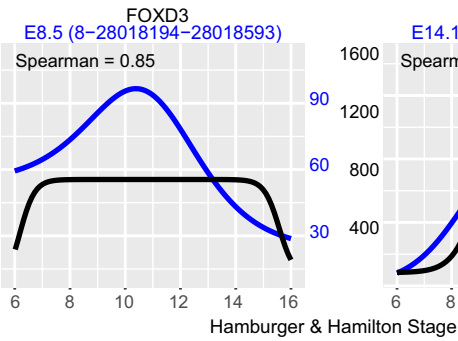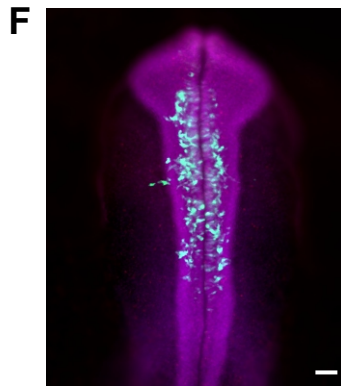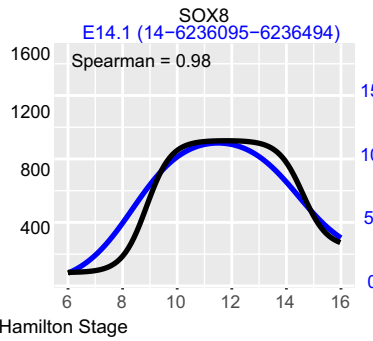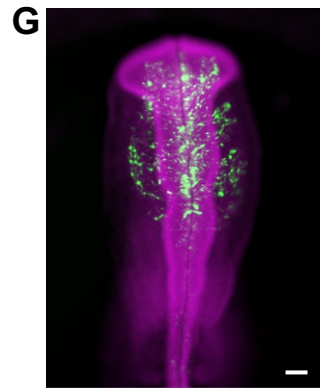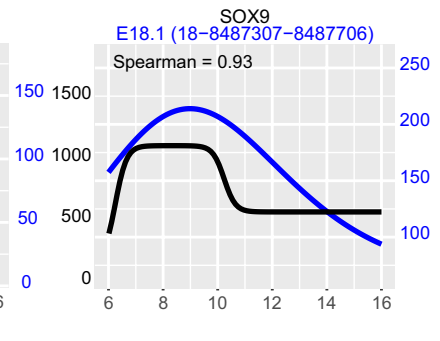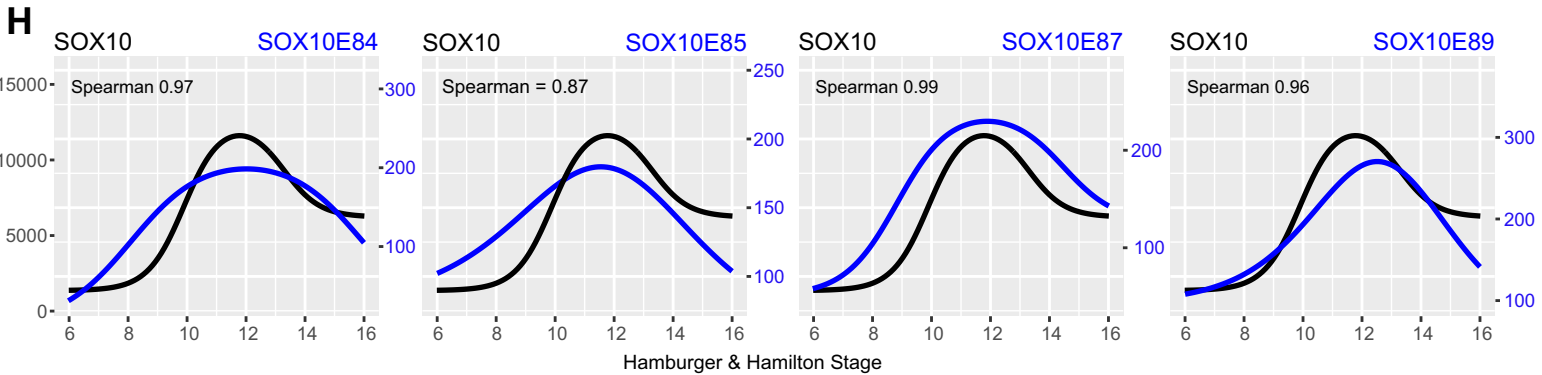

**Fig. S2 (Related to figure 2) ATAC-Seq quality control, DiffTF and chromVAR integration, and in-vivo verification of peak to gene correlation analysis.**

**(A)** Quality control plots for chicken ATAC-Seq samples. Left, an ATAC-Seq TSS enrichment plot with mean coverage around the transcription start site and +/- 2 kilobases of all genes. Right top, the insert size distribution plot. Fragments < 120bp indicate nucleosome free binding. Right bottom, a genomic annotation plot of all ATAC-Seq peaks, demonstrating promoter, intronic, and distal intergenic enrichment.

**(B)** Genes identified from peak to gene correlation analysis in the early, mid, and late peak groups.

**(C)** A heatmap of DiffTF classified activating transcription factors variability over time. Transcription factors are clustered hierarchically, resulting in two large clusters.

**(D)** *Ex ovo* electroporation of the *MSX1 E4.4* enhancer and the correlation plot between the gene (black) and the enhancer (blue). Scale bar 100  $\mu\text{m}$ .

**(E)** *Ex ovo* electroporation of the *FOXD3 E8.5* enhancer and the correlation plot between the gene (black) and the enhancer (blue). Scale bar 100  $\mu\text{m}$ .

**(F)** *Ex ovo* electroporation of the *SOX8 E14.1* enhancer and the correlation plot between the gene (black) and the enhancer (blue). Scale bar 100  $\mu\text{m}$ .

**(G)** *Ex ovo* electroporation of the *SOX9 E18.1* enhancer and the correlation plot between the gene (black) and the enhancer (blue). Scale bar 100  $\mu\text{m}$ .

**(H)** Correlation plots for *SOX10* and four associated enhancer regions, demonstrating that this method can robustly capture known enhancers.

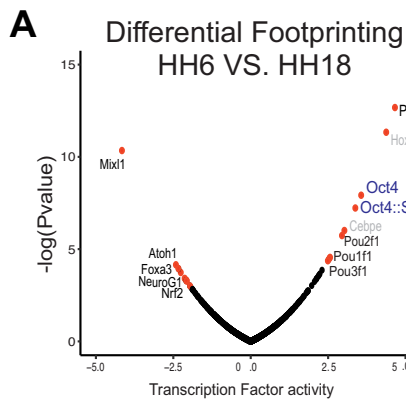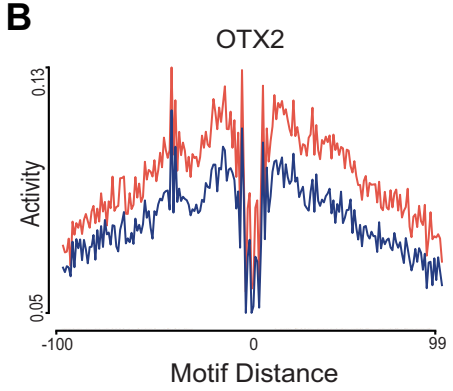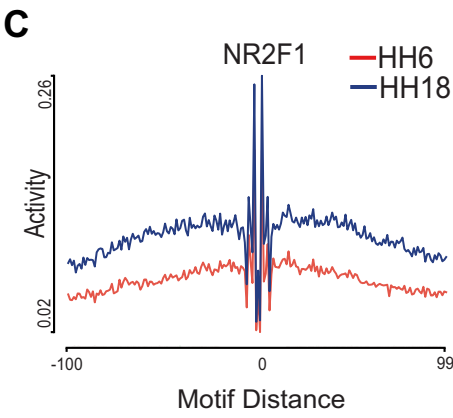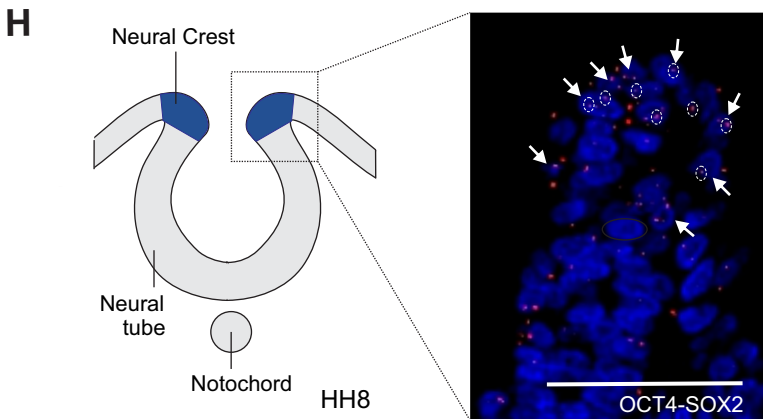

**D** CUT&RUN Correlation

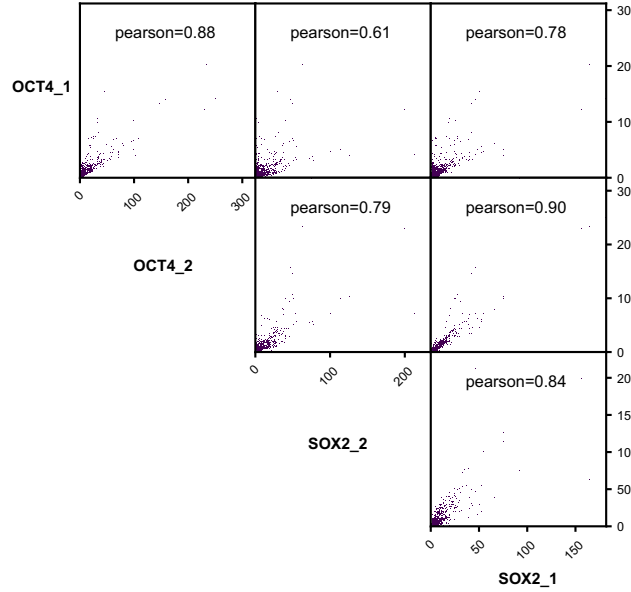

**E** Motif Enrichment & Fragment Size

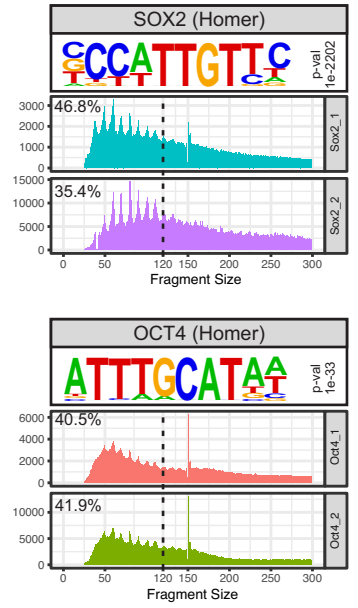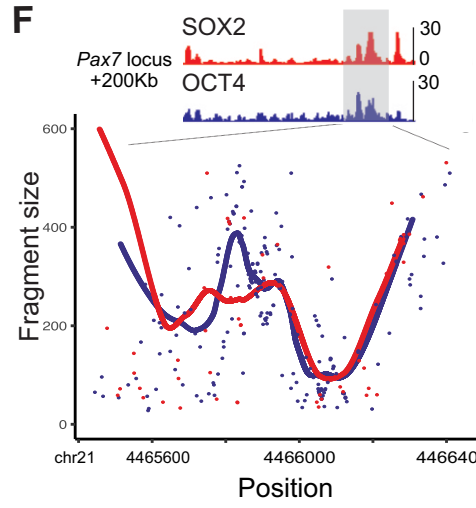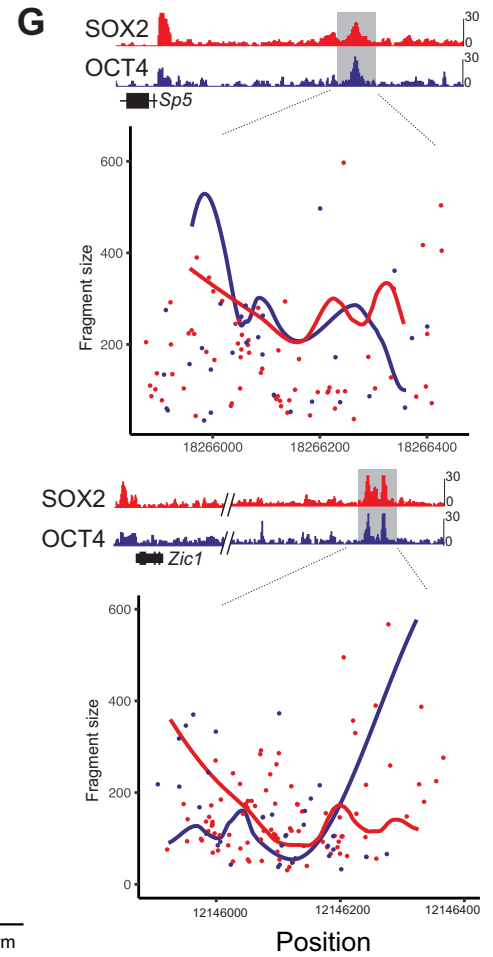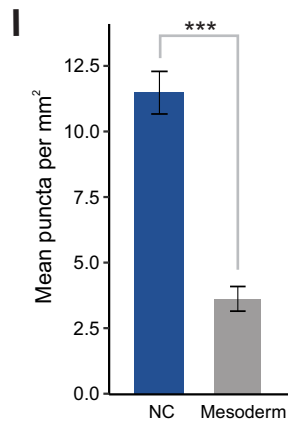

**Fig. S3 (Related to figure 3) CUT&RUN quality control, transcription factor footprinting and EChO analysis.**

**(A)** Differential footprinting analysis between HH6 and HH18 ATAC-Seq samples shows OCT4 and OCT4-SOX2 are two of the top motifs whose footprint are enriched in HH6.

**(B)** A motif footprinting plot for OTX2, showing enrichment in HH6 ATAC-Seq samples.

**(C)** A motif footprinting plot for NR2F1, showing enrichment in HH18 ATAC-Seq samples.

**(D)** Bin-wise correlation quality control plots for the OCT4 and SOX2 CUT&RUN libraries.

**(E)** Motif enrichment (from Homer) and fragment size distribution quality control plots for the SOX2 and OCT4 CUT&RUN libraries.

**(F)** A genome browser plot of a putative regulatory region for *SP5*. EChO analysis of OCT4 and SOX2 CUT&RUN data shows co-binding events (local minima).

**(G)** A genome browser plot of a putative regulatory region for *ZIC1*. EChO analysis of OCT4 and SOX2 CUT&RUN data shows co-binding of the two factors in the *ZIC1* locus.

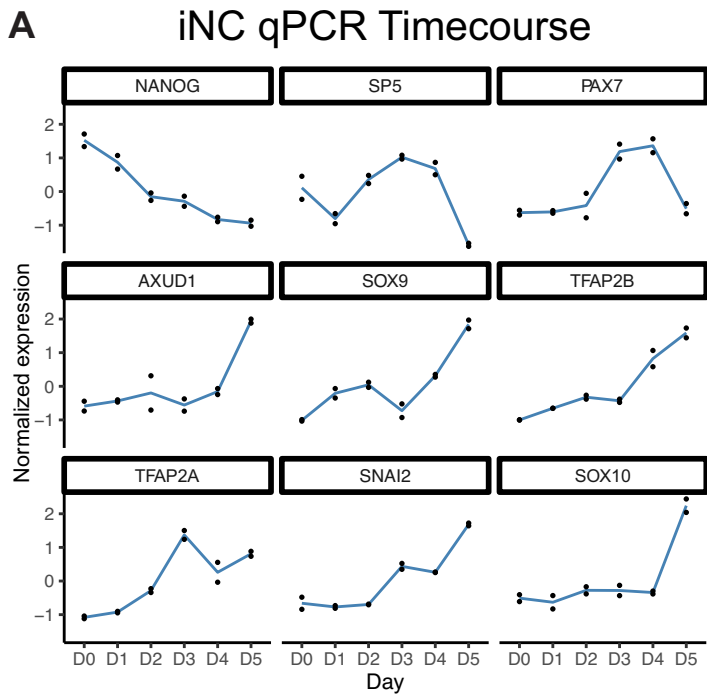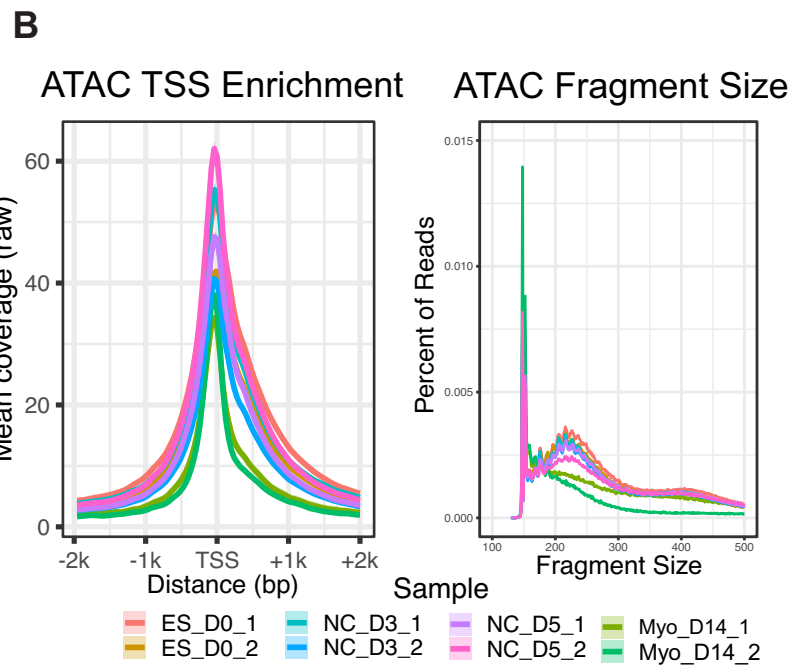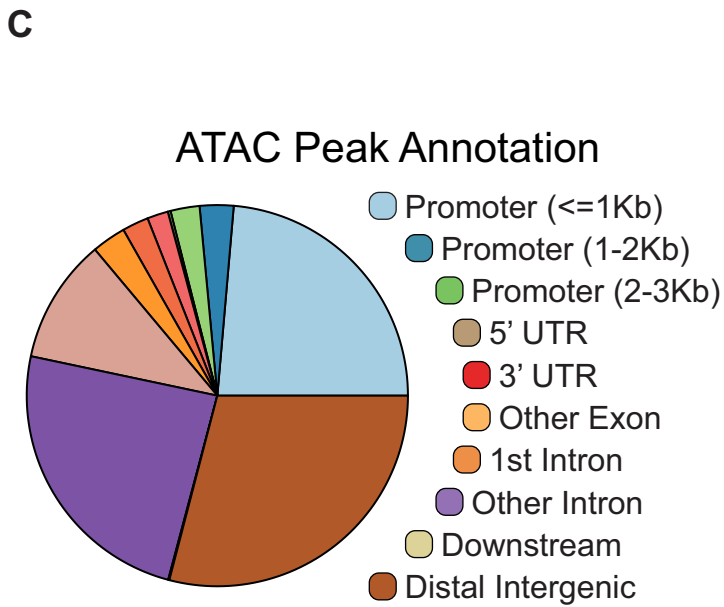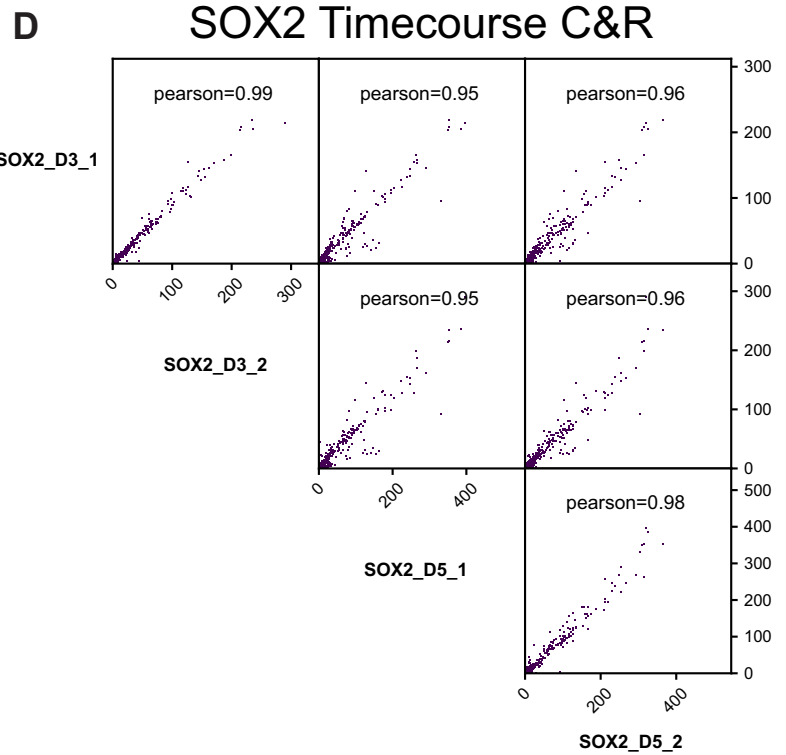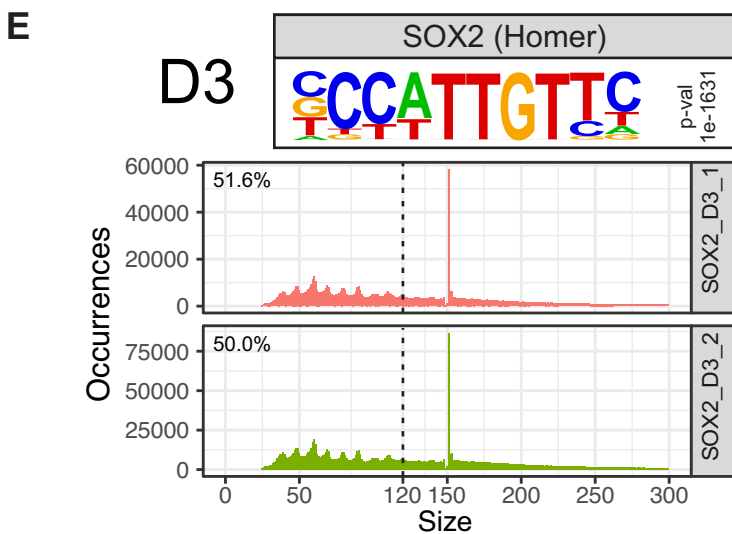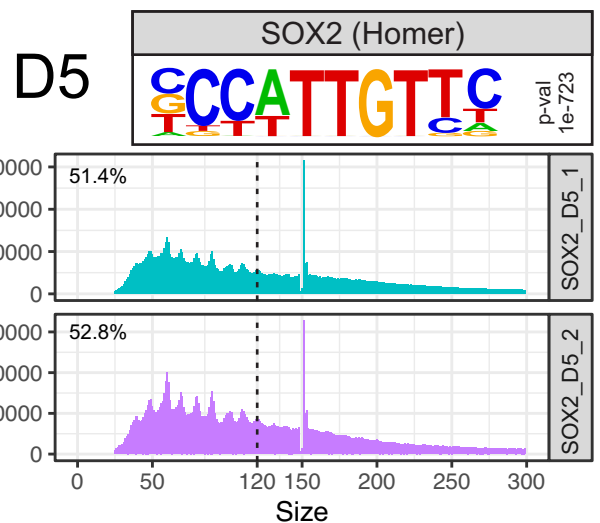

**Fig. S4. (Related to figure 4) hiNCC expression characterization and genomic library quality control.**

**(A)** qPCR expression plots for various genes during the human embryonic stem cell (D0) to induced neural crest cell (D5) differentiation process.

**(B)** Quality control plots for ATAC-Seq performed across the iNC time course. Left, an ATAC-Seq TSS enrichment plot with mean coverage around the transcription start site and +/- 2 kilobases of all genes. Right, the insert size distribution plot. Fragments < 120bp indicate nucleosome free binding.

**(C)** Genomic annotation of all ATAC-Seq peaks, demonstrating enrichment at promoters, introns, and distal intergenic regions.

**(D)** Bin-wise correlation quality control plot for SOX2 CUT&RUN for D3 and D5 iNC CUT&RUN libraries.

**(E)** Motif enrichment for SOX2 (from Homer) and fragment size distribution for the D3 and D5 iNC CUT&RUN libraries.



# A

## SOX2 Expression in SOX2-OCT4 OE

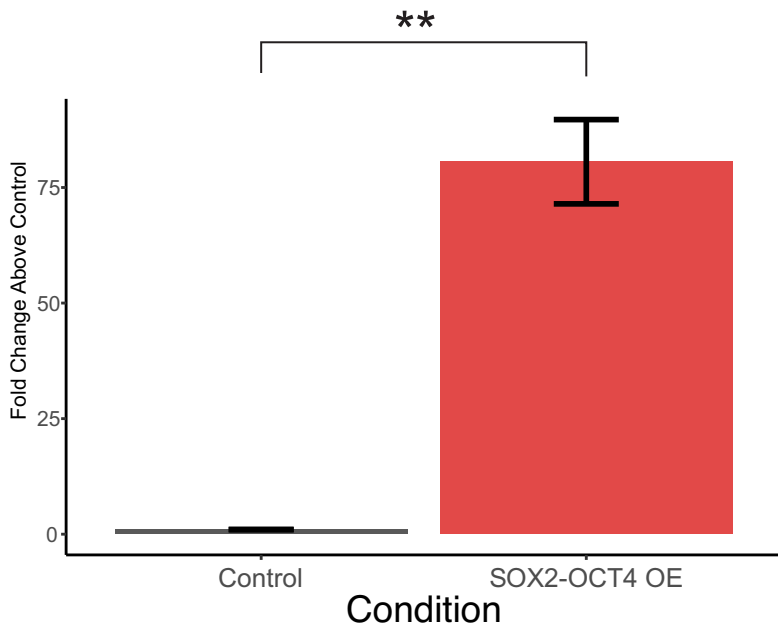

# B

## Cell Death and Proliferation in SOX2-OCT4 OE

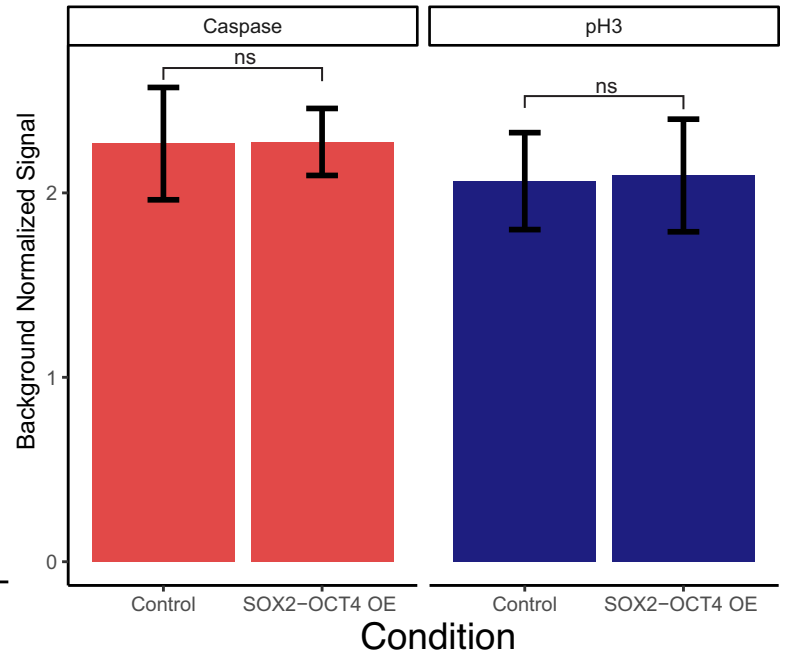

**Fig. S5. (Related to figure 5) Quality control of SOX2/OCT4 in-vivo overexpression.**

**(A)** Verification of SOX2 overexpression via qPCR for the SOX2-OCT4 overexpression experiment. qPCR was performed with five independent biological replicates with three technical replicates. SOX2-OCT4 OE condition had significantly higher (\*\*, p-val 0.018) from a student's two-sided t-test.

**(B)** Quantification of immunohistochemistry for cell death (Caspase) and proliferation (pH3) in control versus SOX2-OCT4 overexpression conditions (ns, p-val > 0.05).

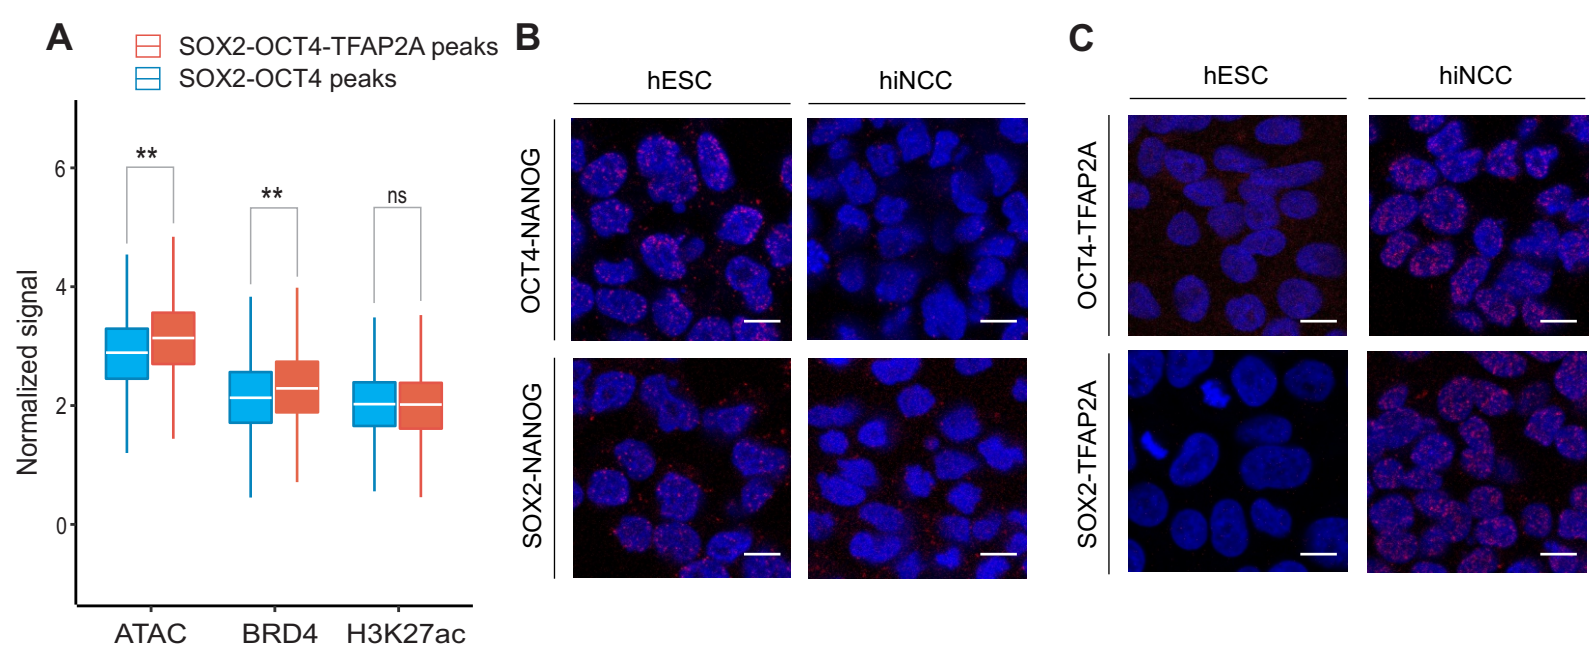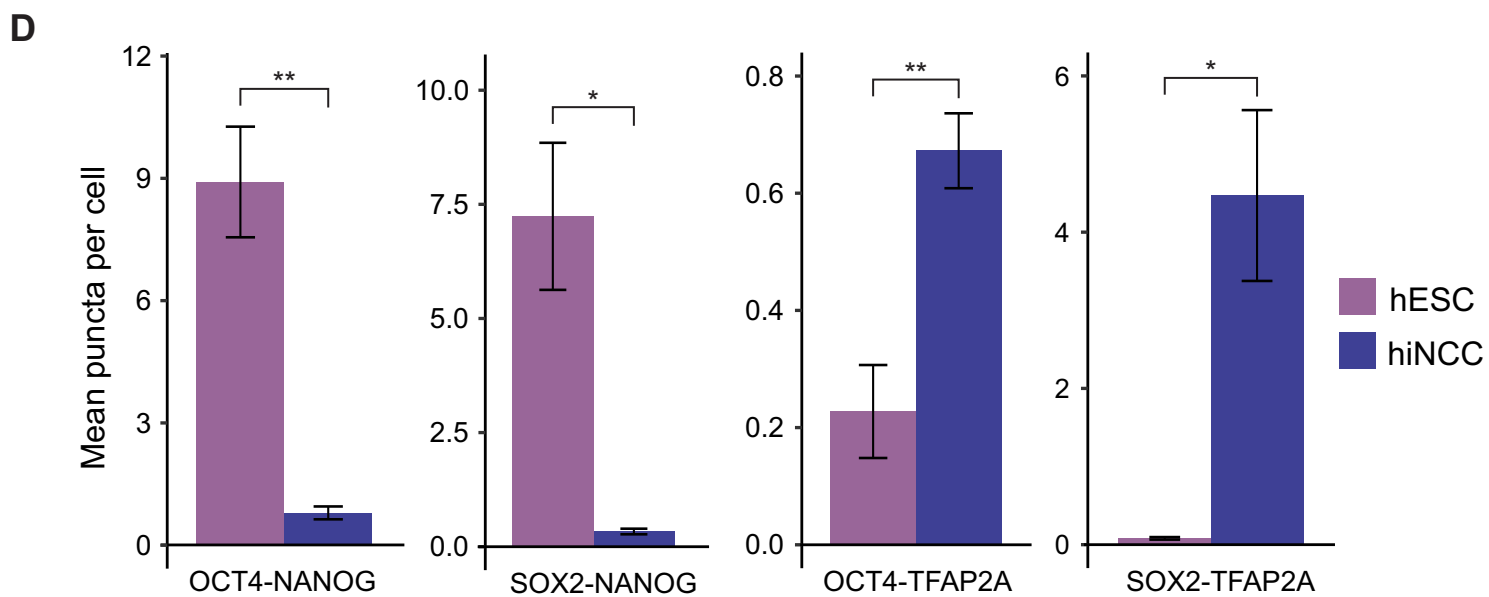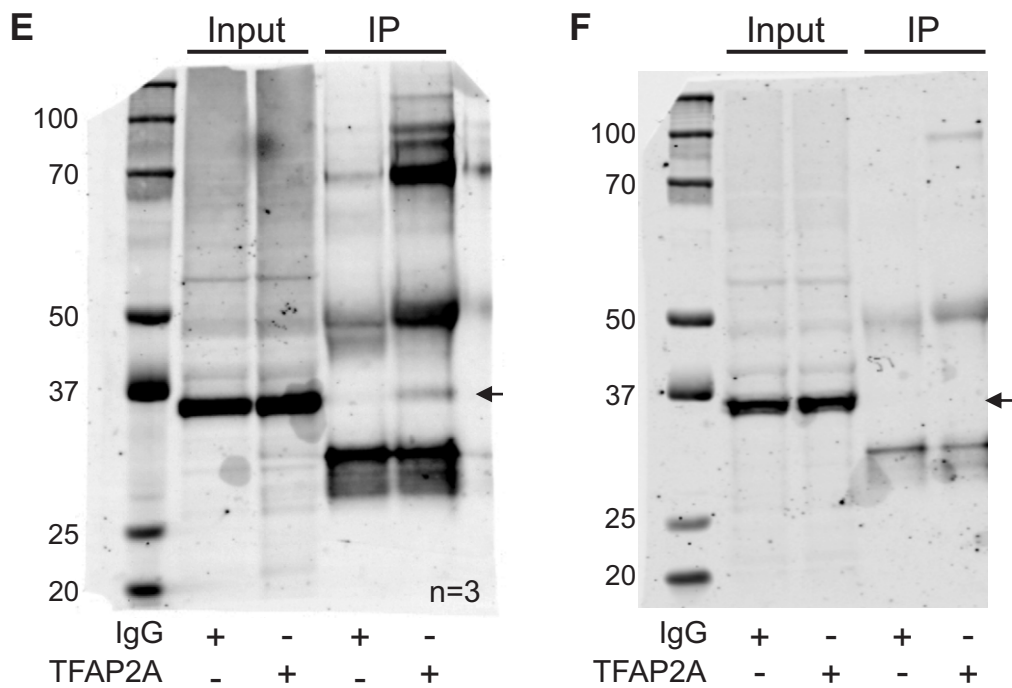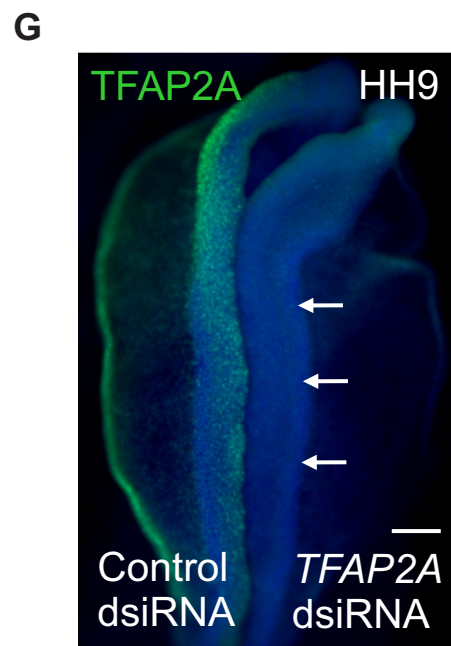

**Fig. S6. (Related to figure 6) Endogenous Co-IP, TFAP2A dsiRNA validation, and proximity ligation assays.**

**(A)** Boxplot showing that ATAC signal and BRD4 binding is higher in peaks bound by all 3 factors than those only bound by SOX2 and OCT4. H3K27ac signal at these regions was not significantly different.

**(B)** Proximity Ligation Assays (PLAs) for SOX2/OCT4-NANOG interactions. Positive interactions appear as nuclear, red puncta. Scale bar 10  $\mu\text{m}$ .

**(C)** Proximity Ligation Assays (PLAs) for SOX2/OCT4-TFAP2A interactions. Positive interactions appear as nuclear, red puncta.

**(D)** Quantification of parts D&E. Samples were compared using a single tailed Student's t-test (\* p-val < 0.05; \*\* p-val < 0.01)

**(E)** A western blot for SOX2 in an endogenous (chicken) co-immunoprecipitation assay. Under IP conditions, pulling down with TFAP2A results in detection of SOX2.

**(F)** A western blot for SOX2 in an endogenous (human embryonic stem cell) co-immunoprecipitation assay. Pulldown of TFAP2A is unable to recover SOX2 in D0 human ESCs.

**(G)** A HH9 embryo that has been bilaterally transfected with the *TFAP2A* dsiRNA on the right side of the embryo and immunostained for the TFAP2A protein. Scale bar 100  $\mu\text{m}$ .

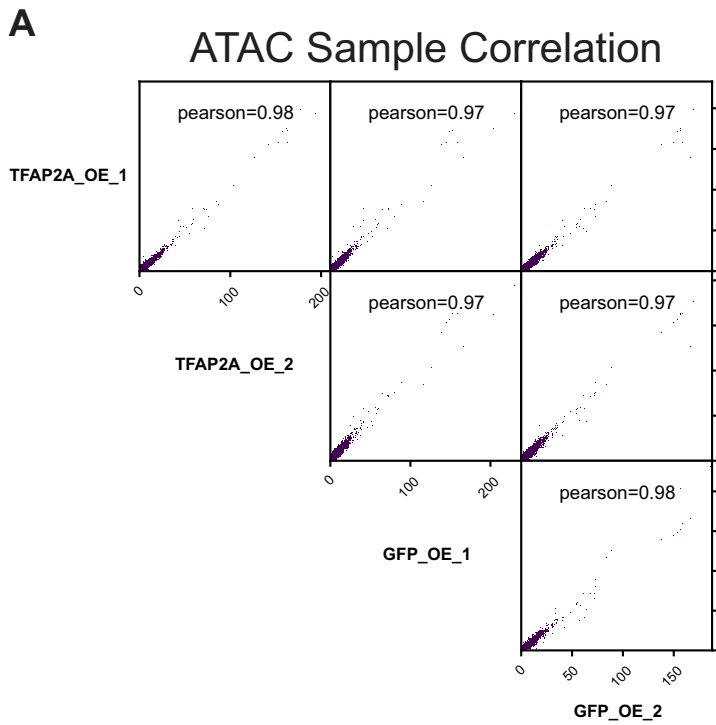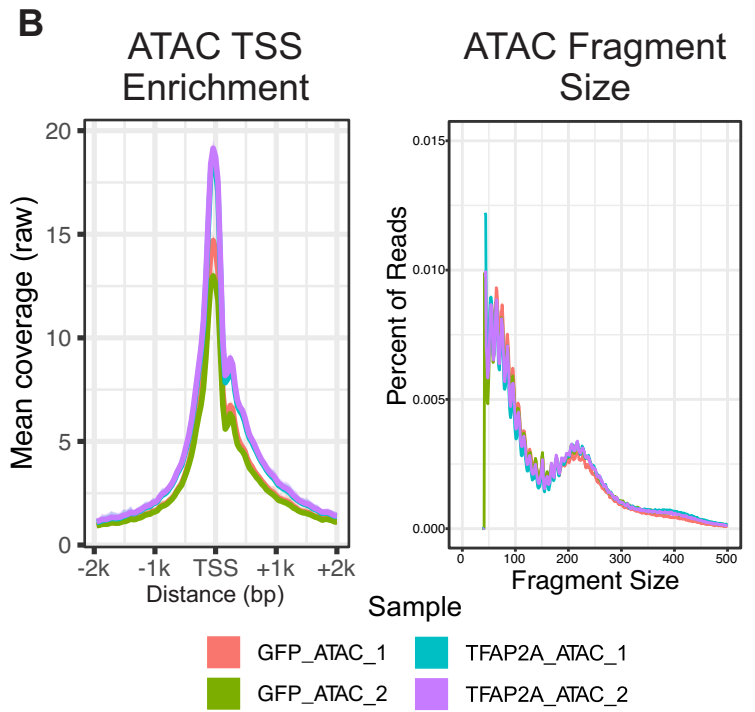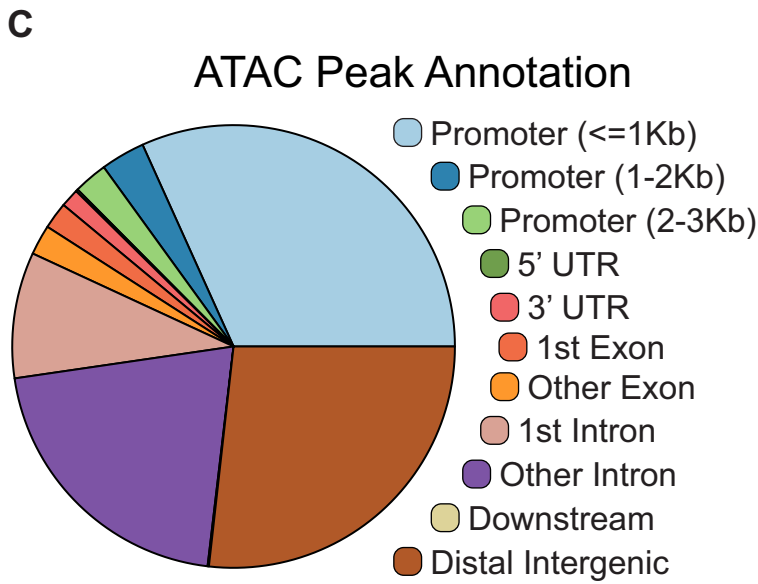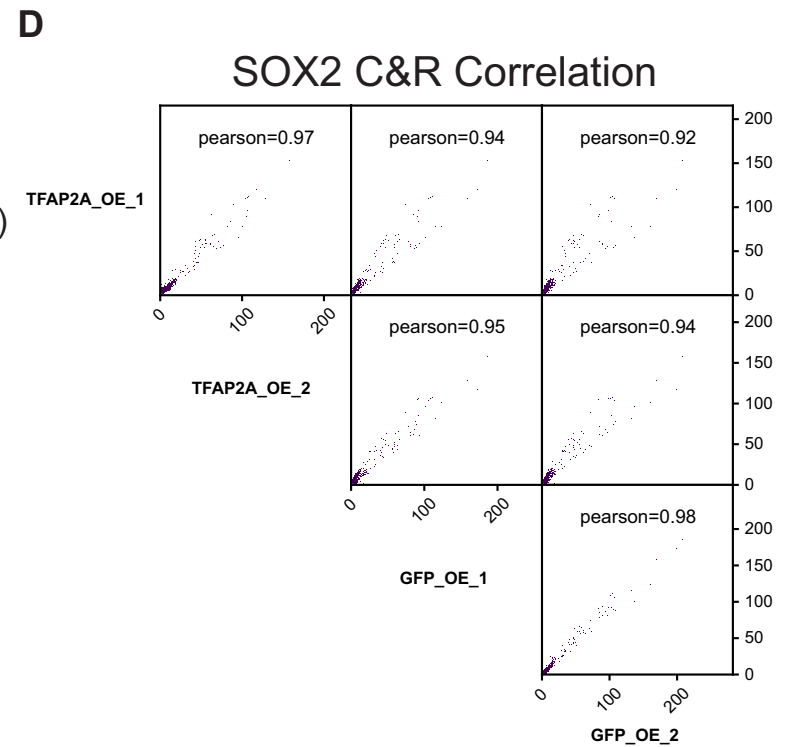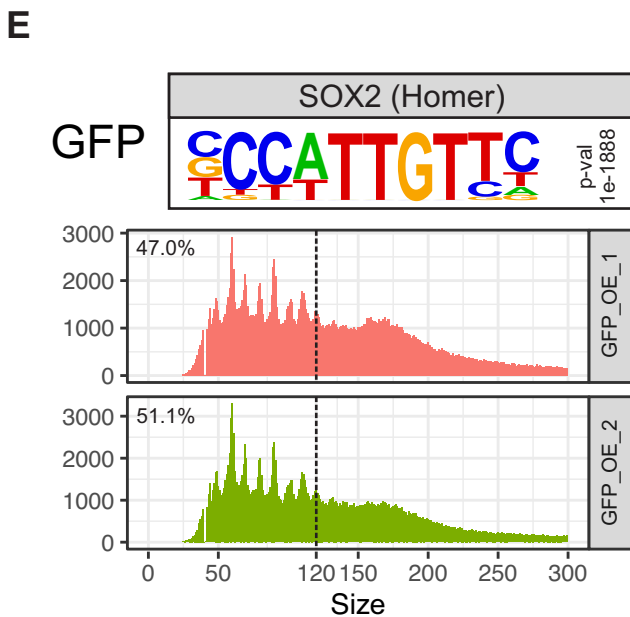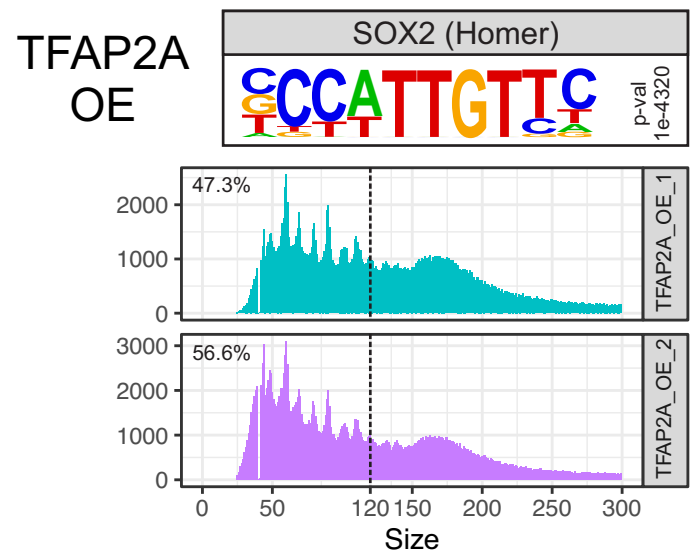

**Fig. S7. (Related to figure 7) Quality control of genomic datasets in hESCs with TFAP2A and GFP overexpression.**

**(A)** Bin-wise correlation quality control plots for TFAP2A and GFP overexpression ATAC libraries.

**(B)** Quality control plots for TFAP2A and GFP overexpression ATAC-Seq libraries. Left, an ATAC-Seq TSS enrichment plot with mean coverage around the transcription start site and +/- 2 kilobases of all genes. Right, an insert size distribution plot demonstrating nucleosome patterning.

**(C)** A genomic annotation plot for ATAC-Seq peaks, with strong enrichment in promoters, introns, and distal intergenic regions.

**(D)** A bin-wise correlation quality control plot for the TFAP2A and GFP overexpression SOX2 CUT&RUN libraries.

**(E)** SOX2 motif enrichment (from Homer) and fragment size distribution for TFAP2A and GFP overexpression CUT&RUN libraries.
